# Supplementary material for: Anticancer Applications of Nanostructured Silica-Based Materials Functionalized with Titanocene Derivatives: Induction of Cell Death Mechanism through TNFR1 Modulation
Source: PubMed Central journal article supplement (PMC5848921; doi:10.3390/ma11020224), 2018-01-31
Supplement: materials-11-00224-s001.pdf [file materials-11-00224-s001.pdf]

1 *Supplementary Material*

2 **Anticancer Applications of Nanostructured Silica-**  
 3 **Based Materials Functionalized with Titanocene**  
 4 **Derivatives: Induction of Cell Death Mechanism**  
 5 **through TNFR1 Modulation**

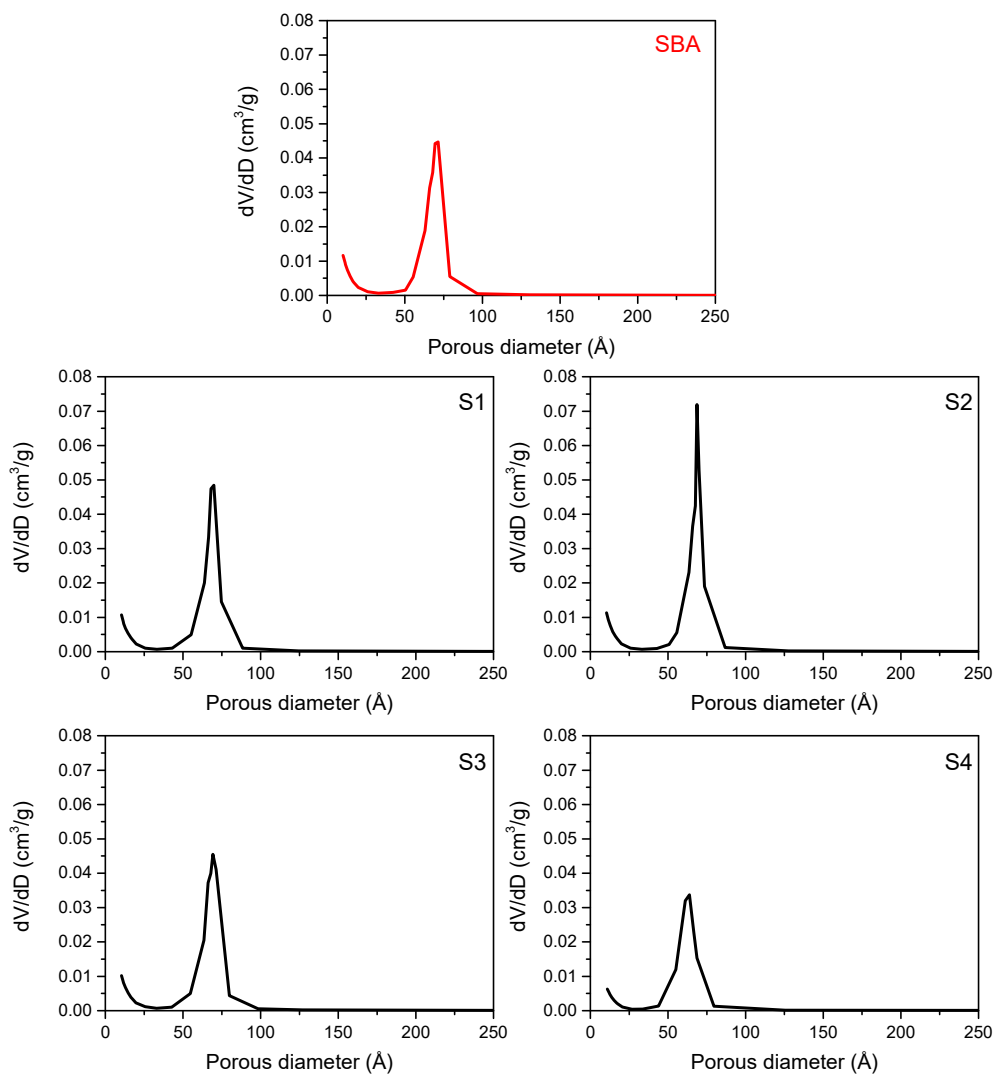

6  
 7  
 8

**Figure S1.** Pore size distributions of the all the synthesized materials where a homogeneous narrow distribution is observed.

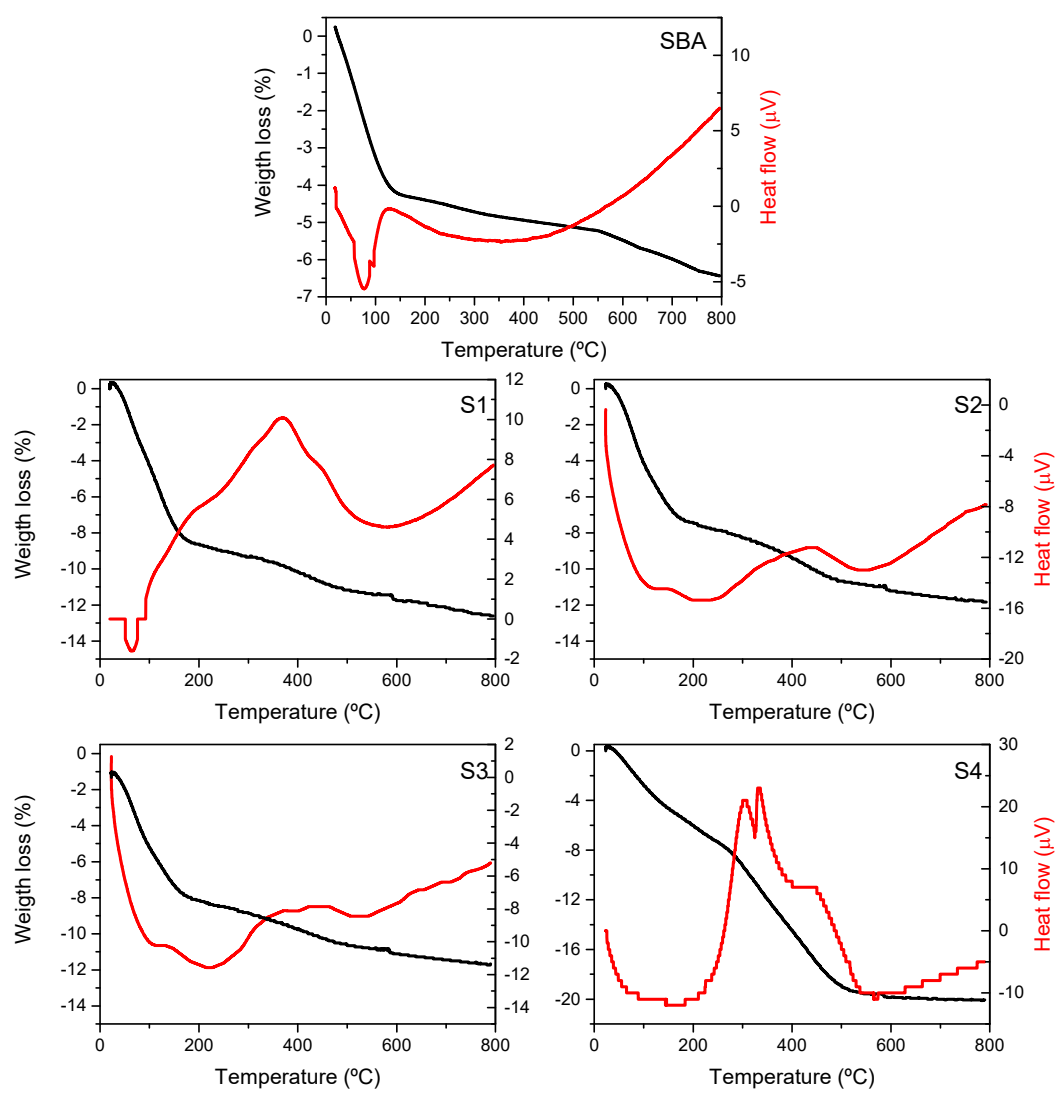

9  
10

**Figure S2.** Thermogravimetric analysis of materials SBA-15, S1, S2, S3 and S4.

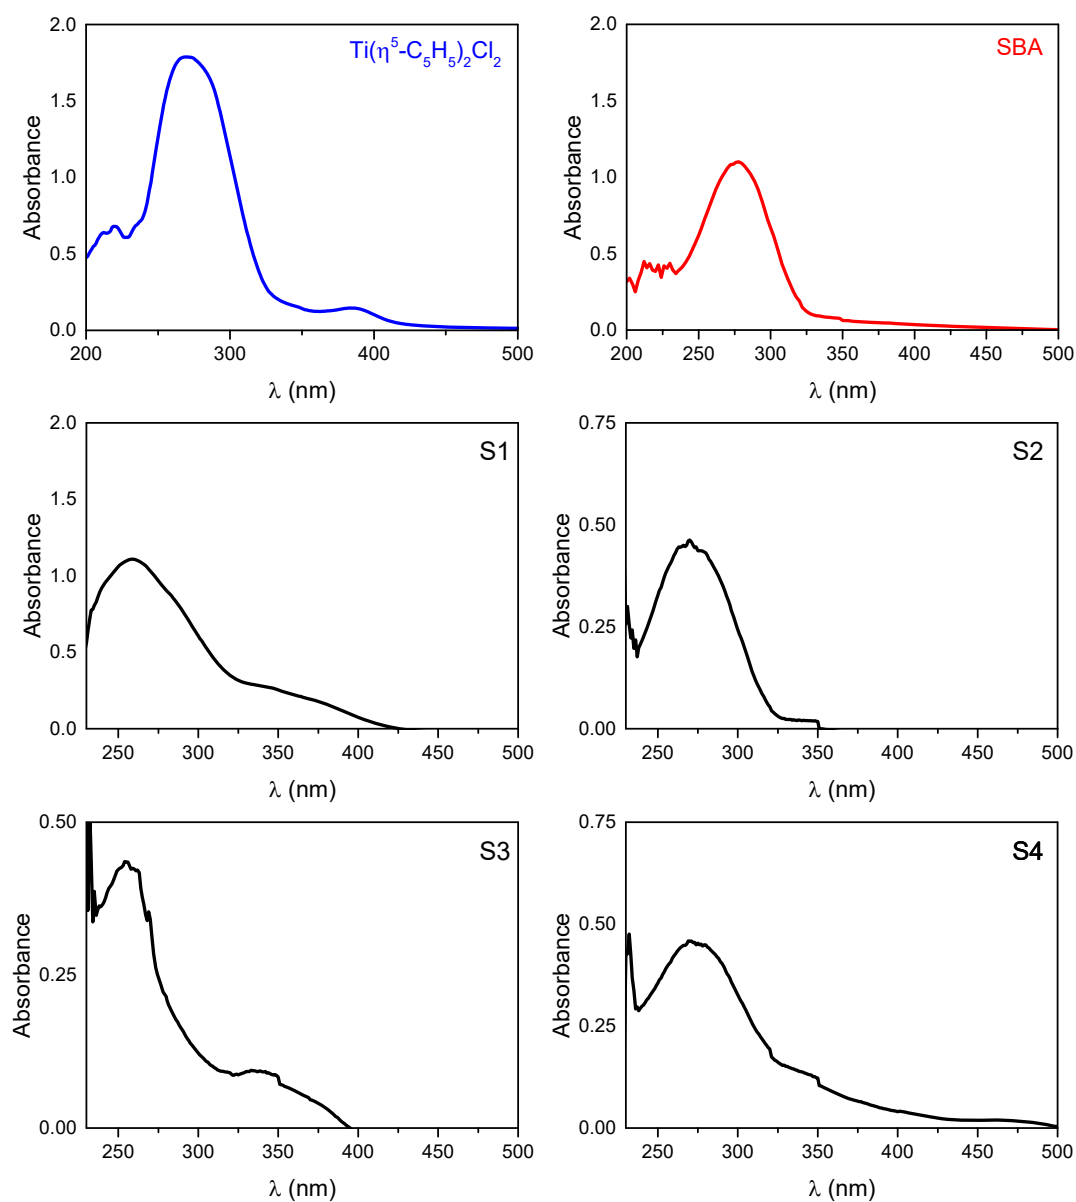

**Figure S3.** UV-vis spectra of titanocene dichloride, unmodified SBA-15 and S1-S4.

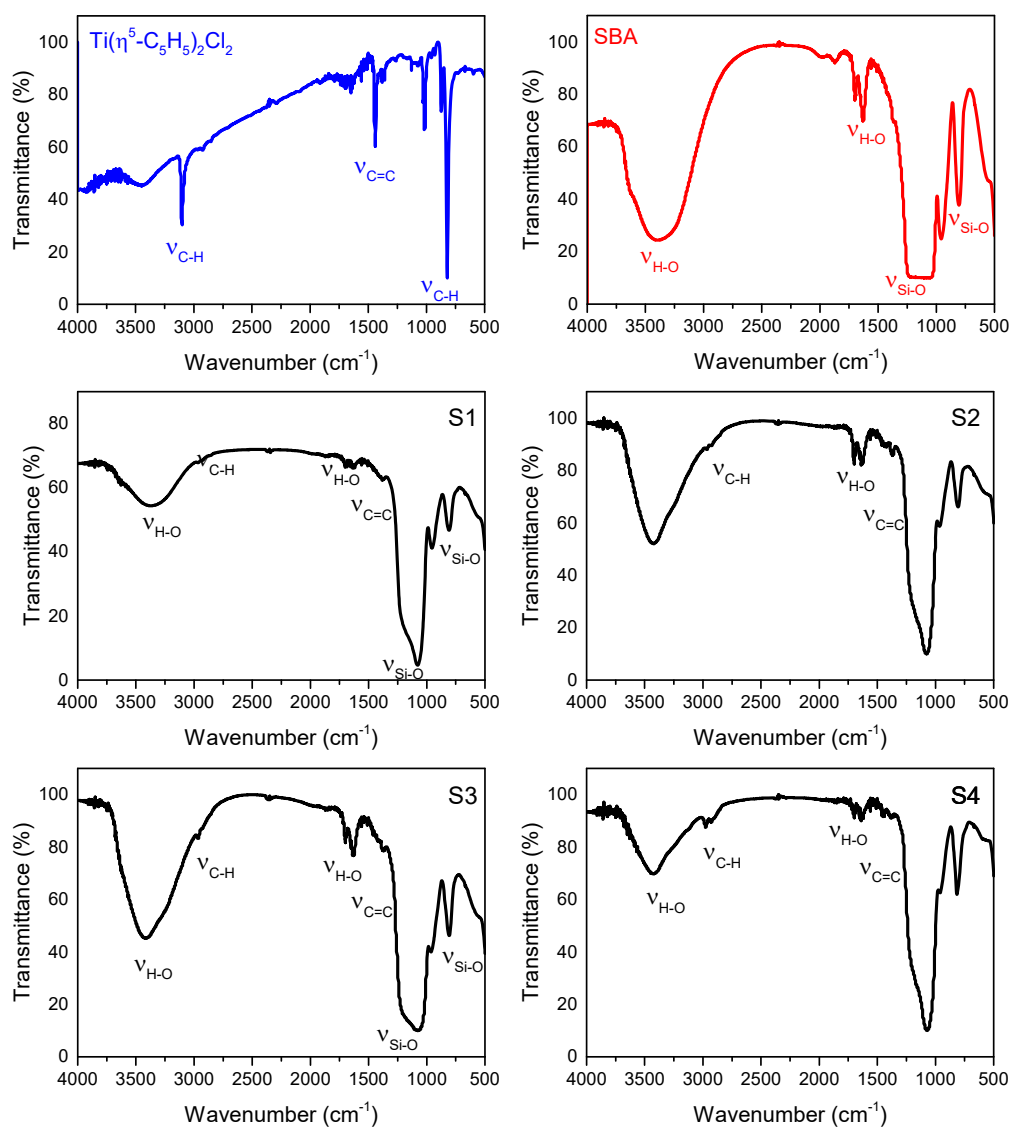

13

14

**Figure S4.** FT-IR spectra of titanocene dichloride, unmodified SBA-15 and S1-S4.
